# Supplementary material for: Exploring Fungal Biomarkers as Predictors of Treatment Response in Ulcerative Colitis Patients Receiving Anti-TNF Therapy
Source: Research Square preprint supplement (doi:10.21203/rs.3.rs-7749916/v1), 2025-10-29
Supplement: Supplementary file 1 [file 02b2549d8982dab36a12c5ac.docx]

**Table S1.** Generalized Estimating Equation Models Evaluating the Association Between Fungal Load, Phase, and Clinical Outcomes in UC

| **DV** | **Model** | **Type** | **Predictor** | **Estimation (95% CI)** | ***p*-value** |
| --- | --- | --- | --- | --- | --- |
| Fungal Load Prediction Disease Status | 1 | Without Interaction | Candida albicans DNA copy number | 1.00 (1.00, 1.00) | 0.359 |
| Phase | 12.07 (3.00, 48.50) | <0.001 |
| With Interaction | Candida albicans DNA copy number | 1.00 (1.00, 1.00) | 0.075 |
| Phase | 8.44 (1.53, 46.62) | 0.014 |
| Candida albicans DNA copy number × Phase | 1.00 (1.00, 1.00) | 0.279 |
| 2 | Without Interaction | Candida glabrata DNA copy number | 1.00 (1.00, 1.00) | 0.463 |
| Phase | 11.87 (3.12, 45.13) | <0.001 |
| With Interaction | Candida glabrata DNA copy number | 1.00 (1.00, 1.00) | 0.410 |
| Phase | 10.91 (2.77, 42.90) | <0.001 |
| Candida glabrata DNA copy number × Phase | 1.00 (1.00, 1.00) | 0.412 |
| 3 | Without Interaction | Candida tropicalis DNA copy number | 0.99 (0.97, 1.00) | 0.153 |
| Phase | 12.01 (3.17, 45.48) | <0.001 |
| With Interaction | Candida tropicalis DNA copy number | 0.99 (0.96, 1.02) | 0.457 |
| Phase | 12.08 (3.24, 45.04) | <0.001 |
| Candida tropicalis DNA copy number × Phase | 1.00 (0.96, 1.04) | 0.929 |
| 4 | Without Interaction | Saccharomyces cerevisiae DNA copy number | 1.00 (1.00, 1.00) | 0.133 |
| Phase | 13.21 (3.23, 54.09) | <0.001 |
| With Interaction | Saccharomyces cerevisiae DNA copy number | 1.00 (1.00, 1.00) | 0.126 |
| Phase | 10.65 (2.41, 47.02) | 0.002 |
| Saccharomyces cerevisiae DNA copy number × Phase | 1.00 (1.00, 1.00) | 0.382 |
| Fungal Load Prediction Clinical Remission | 1 | Without Interaction | Candida albicans DNA copy number | 1.00 (1.00, 1.00) | 0.725 |
| Phase | 1.61 (1.06, 2.46) | 0.027 |
| With Interaction | Candida albicans DNA copy number | 1.00 (1.00, 1.00) | 0.494 |
| Phase | 2.51 (1.16, 5.42) | 0.020 |
| Candida albicans DNA copy number × Phase | 1.00 (1.00, 1.00) | 0.114 |
| 2 | Without Interaction | Candida glabrata DNA copy number | 1.00 (1.00, 1.00) | 0.017 |
| Phase | 1.46 (1.00, 2.13) | 0.049 |
| With Interaction | Candida glabrata DNA copy number | 1.00 (1.00, 1.00) | <0.001 |
| Phase | 1.48 (0.98, 2.23) | 0.063 |
| Candida glabrata DNA copy number × Phase | 1.00 (1.00, 1.00) | 0.740 |
| 3 | Without Interaction | Candida tropicalis DNA copy number | 0.98 (0.97, 1.00) | 0.106 |
| Phase | 1.55 (1.02, 2.34) | 0.039 |
| With Interaction | Candida tropicalis DNA copy number | 1.00 (0.97, 1.03) | 0.951 |
| Phase | 1.96 (1.34, 2.88) | <0.001 |
| Candida tropicalis DNA copy number × Phase | 0.92 (0.83, 1.02) | 0.097 |
| 4 | Without Interaction | Saccharomyces cerevisiae DNA copy number | 1.00 (1.00, 1.00) | 0.358 |
| Phase | 1.65 (1.09, 2.52) | 0.018 |
| With Interaction | Saccharomyces cerevisiae DNA copy number | 1.00 (1.00, 1.00) | 0.512 |
| Phase | 1.62 (0.82, 3.22) | 0.167 |
| Saccharomyces cerevisiae DNA copy number × Phase | 1.00 (1.00, 1.00) | 0.925 |
| Fungal Load Prediction Endoscopic Remission | 1 | Without Interaction | Candida albicans DNA copy number | 1.00 (1.00, 1.00) | 0.524 |
| Phase | 1.85 (1.14, 2.99) | 0.012 |
| With Interaction | Candida albicans DNA copy number | 1.00 (1.00, 1.00) | 0.684 |
| Phase | 2.89 (1.11, 7.53) | 0.030 |
| Candida albicans DNA copy number × Phase | 1.00 (1.00, 1.00) | 0.157 |
| 2 | Without Interaction | Candida glabrata DNA copy number | 1.00 (1.00, 1.00) | 0.042 |
| Phase | 1.68 (1.11, 2.56) | 0.015 |
| With Interaction | Candida glabrata DNA copy number | 1.00 (1.00, 1.00) | <0.001 |
| Phase | 1.71 (1.06, 2.76) | 0.027 |
| Candida glabrata DNA copy number × Phase | 1.00 (1.00, 1.00) | 0.747 |
| 3 | Without Interaction | Candida tropicalis DNA copy number | 0.99 (0.97, 1.01) | 0.166 |
| Phase | 1.83 (1.18, 2.85) | 0.007 |
| With Interaction | Candida tropicalis DNA copy number | 1.00 (0.96, 1.03) | 0.909 |
| Phase | 2.07 (1.36, 3.16) | <0.001 |
| Candida tropicalis DNA copy number × Phase | 0.98 (0.94, 1.01) | 0.220 |
| 4 | Without Interaction | Saccharomyces cerevisiae DNA copy number | 1.00 (1.00, 1.00) | 0.626 |
| Phase | 1.91 (1.24, 2.95) | 0.003 |
| With Interaction | Saccharomyces cerevisiae DNA copy number | 1.00 (1.00, 1.00) | 0.862 |
| Phase | 2.10 (1.04, 4.22) | 0.038 |
| Saccharomyces cerevisiae DNA copy number × Phase | 1.00 (1.00, 1.00) | 0.659 |
| Fungal Load Prediction Severity of Disease | 1 | Without Interaction | Candida albicans DNA copy number | 1.00 (1.00, 1.00) | 0.957 |
| Phase | 8.87 (3.95, 19.94) | <0.001 |
| With Interaction | Candida albicans DNA copy number | 1.00 (1.00, 1.00) | 0.642 |
| Phase | 5.73 (1.80, 18.23) | 0.003 |
| Candida albicans DNA copy number × Phase | 1.00 (1.00, 1.00) | 0.391 |
| 2 | Without Interaction | Candida glabrata DNA copy number | 1.00 (1.00, 1.00) | 0.009 |
| Phase | 9.36 (3.85, 22.74) | <0.001 |
| With Interaction | Candida tropicalis DNA copy number | 1.01 (0.99, 1.03) | 0.418 |
| Phase | 9.74 (3.97, 23.85) | <0.001 |
| Candida tropicalis DNA copy number × Phase | 0.99 (0.98, 1.01) | 0.216 |
| 3 | Without Interaction | Candida tropicalis DNA copy number | 1.00 (0.99, 1.01) | 0.971 |
| Phase | 8.89 (3.91, 20.21) | <0.001 |
| With Interaction | Candida tropicalis DNA copy number | NA | NA |
| Phase | NA | NA |
| Candida tropicalis DNA copy number × Phase | NA | NA |
| 4 | Without Interaction | Saccharomyces cerevisiae DNA copy number | 1.00 (1.00, 1.00) | 0.909 |
| Phase | 8.83 (3.86, 20.17) | <0.001 |
| With Interaction | Saccharomyces cerevisiae DNA copy number | 1.00 (1.00, 1.00) | 0.993 |
| Phase | 9.13 (3.03, 27.48) | <0.001 |
| Saccharomyces cerevisiae DNA copy number × Phase | 1.00 (1.00, 1.00) | 0.872 |
| Fungal Load Prediction Disease Duration | 1 | Without Interaction | Candida albicans DNA copy number | 0.00 (0.00, 0.01) | 0.556 |
| Phase | 5.45 (-12.64, 23.54) | 0.555 |
| With Interaction | Candida albicans DNA copy number | 0.01 (0.00, 0.01) | 0.091 |
| Phase | 14.90 (-7.41, 37.22) | 0.191 |
| Candida albicans DNA copy number × Phase | -0.01 (-0.02, 0.00) | 0.119 |
| 2 | Without Interaction | Candida glabrata DNA copy number | 0.00 (0.00, 0.00) | <0.001 |
| Phase | 6.00 (-12.36, 24.35) | 0.522 |
| With Interaction | Candida glabrata DNA copy number | 0.00 (0.00, 0.00) | <0.001 |
| Phase | 5.61 (-12.85, 24.06) | 0.551 |
| Candida glabrata DNA copy number × Phase | 0.00 (0.00, 0.00) | <0.001 |
| 3 | Without Interaction | Candida tropicalis DNA copy number | 0.26 (-0.05, 0.57) | 0.096 |
| Phase | 5.58 (-12.62, 23.77) | 0.548 |
| With Interaction | Candida tropicalis DNA copy number | 0.19 (-0.60, 0.98) | 0.636 |
| Phase | 5.05 (-13.87, 23.97) | 0.601 |
| Candida tropicalis DNA copy number × Phase | 0.10 (-0.69, 0.90) | 0.796 |
| 4 | Without Interaction | Saccharomyces cerevisiae DNA copy number | 0.00 (-0.02, 0.01) | 0.799 |
| Phase | 4.33 (-13.88, 22.53) | 0.641 |
| With Interaction | Saccharomyces cerevisiae DNA copy number | 0.00 (-0.02, 0.02) | 0.918 |
| Phase | 6.41 (-15.37, 28.18) | 0.564 |
| Saccharomyces cerevisiae DNA copy number × Phase | 0.00 (-0.02, 0.01) | 0.650 |
| Fungal Load Prediction Calprotectin | 1 | Without Interaction | Candida albicans DNA copy number | 0.00 (-0.01, 0.00) | 0.779 |
| Phase | -34.65 (-50.91, -18.38) | <0.001 |
| With Interaction | Candida albicans DNA copy number | 0.00 (-0.01, 0.00) | 0.616 |
| Phase | -36.40 (-53.98, -18.83) | <0.001 |
| Candida albicans DNA copy number × Phase | 0.00 (-0.01, 0.01) | 0.780 |
| 2 | Without Interaction | Candida glabrata DNA copy number | 0.00 (0.00, 0.00) | 0.050 |
| Phase | -33.25 (-49.70, -16.80) | <0.001 |
| With Interaction | Candida glabrata DNA copy number | 0.00 (0.00, 0.00) | 0.002 |
| Phase | -33.77 (-50.30, -17.23) | <0.001 |
| Candida glabrata DNA copy number × Phase | 0.00 (0.00, 0.00) | <0.001 |
| 3 | Without Interaction | Candida tropicalis DNA copy number | 0.11 (-0.28, 0.51) | 0.568 |
| Phase | -33.64 (-49.77, -17.51) | <0.001 |
| With Interaction | Candida tropicalis DNA copy number | -0.31 (-0.98, 0.37) | 0.373 |
| Phase | -36.64 (-52.87, -20.42) | <0.001 |
| Candida tropicalis DNA copy number × Phase | 0.63 (-0.07, 1.33) | 0.076 |
| 4 | Without Interaction | Saccharomyces cerevisiae DNA copy number | -0.01 (-0.03, 0.00) | 0.115 |
| Phase | -34.20 (-49.05, -19.34) | <0.001 |
| With Interaction | Saccharomyces cerevisiae DNA copy number | -0.01 (-0.03, 0.00) | 0.141 |
| Phase | -35.01 (-53.77, -16.25) | <0.001 |
| Saccharomyces cerevisiae DNA copy number × Phase | 0.00 (-0.01, 0.01) | 0.824 |
| Fungal Load Prediction Treatment Response | 1 | Without Interaction | Candida albicans DNA copy number | 1.00 (1.00, 1.00) | 0.627 |
| Phase | 1.97 (0.93, 4.18) | 0.078 |
| With Interaction | Candida albicans DNA copy number | 1.00 (1.00, 1.00) | 0.517 |
| Phase | 3.21 (1.25, 8.23) | 0.015 |
| Candida albicans DNA copy number × Phase | 1.00 (1.00, 1.00) | 0.167 |
| 2 | Without Interaction | Candida glabrata DNA copy number | 1.00 (1.00, 1.00) | 0.364 |
| Phase | 1.78 (0.81, 3.93) | 0.151 |
| With Interaction | Candida glabrata DNA copy number | 1.00 (1.00, 1.00) | <0.001 |
| Phase | 2.66 (1.31, 5.39) | 0.007 |
| Candida glabrata DNA copy number × Phase | 1.00 (1.00, 1.00) | 0.090 |
| 3 | Without Interaction | Candida tropicalis DNA copy number | 0.98 (0.96, 1.00) | 0.077 |
| Phase | 1.90 (0.88, 4.09) | 0.101 |
| With Interaction | Candida tropicalis DNA copy number | 1.00 (0.97, 1.03) | 0.796 |
| Phase | 2.48 (1.08, 5.69) | 0.032 |
| Candida tropicalis DNA copy number × Phase | 0.92 (0.84, 1.00) | 0.049 |
| 4 | Without Interaction | Saccharomyces cerevisiae DNA copy number | 1.00 (1.00, 1.00) | 0.809 |
| Phase | 2.02 (0.97, 4.22) | 0.060 |
| With Interaction | Saccharomyces cerevisiae DNA copy number | 1.00 (1.00, 1.00) | 0.498 |
| Phase | 2.37 (0.97, 5.78) | 0.059 |
| Saccharomyces cerevisiae DNA copy number × Phase | 1.00 (1.00, 1.00) | 0.343 |

Note: Results from generalized estimating equation (GEE) models evaluating associations between fungal DNA copy numbers, sampling phase, and clinical outcomes in patients with ulcerative colitis are presented. Both main-effect and interaction (fungal load × phase) models were included. Depending on the outcome type, effect estimates are presented as either odds ratios (OR) with 95% confidence intervals (CI) for binary and ordinal outcomes, or as beta coefficients (β) with 95% CIs for continuous outcomes. Abbreviations: UC, ulcerative colitis; GEE, generalized estimating equations; OR, odds ratio; CI, confidence interval; β, regression coefficient.
