# Supplementary material for: Exploring Fungal Biomarkers as Predictors of Treatment Response in Ulcerative Colitis Patients Receiving Anti-TNF Therapy
Source: Research Square preprint supplement (doi:10.21203/rs.3.rs-7749916/v1), 2025-10-29
Supplement: Supplementary file 2 [file 0ee8883de20c9aae3bb39994.docx]

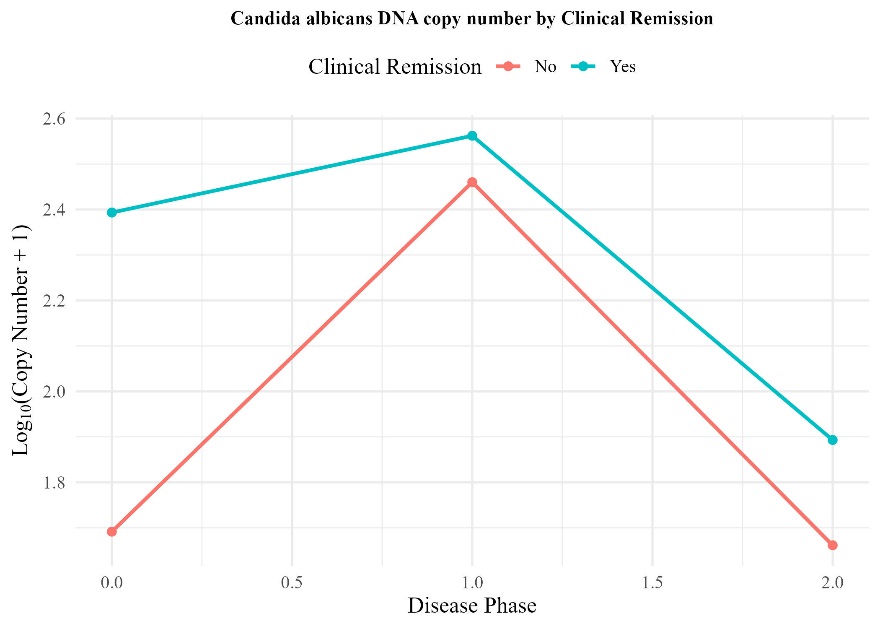

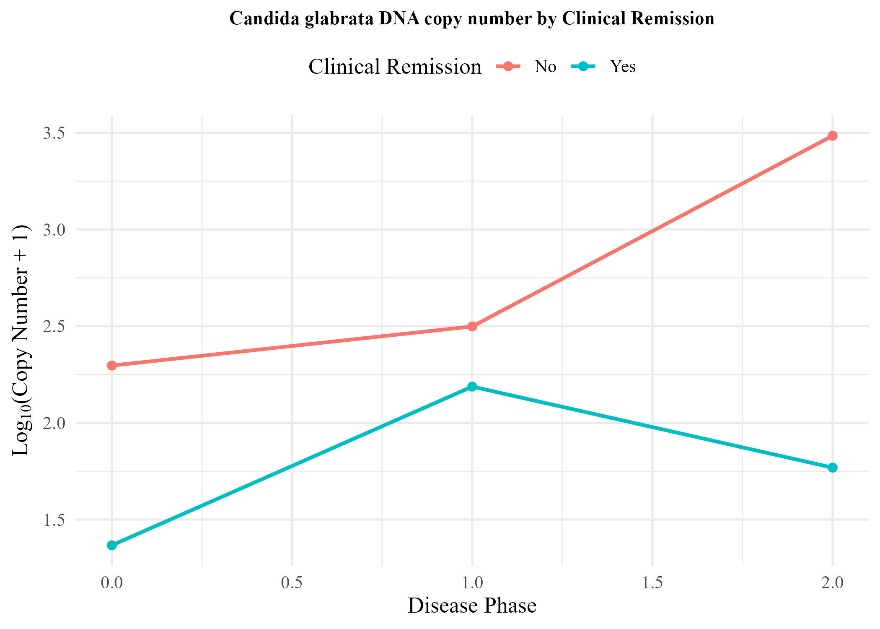


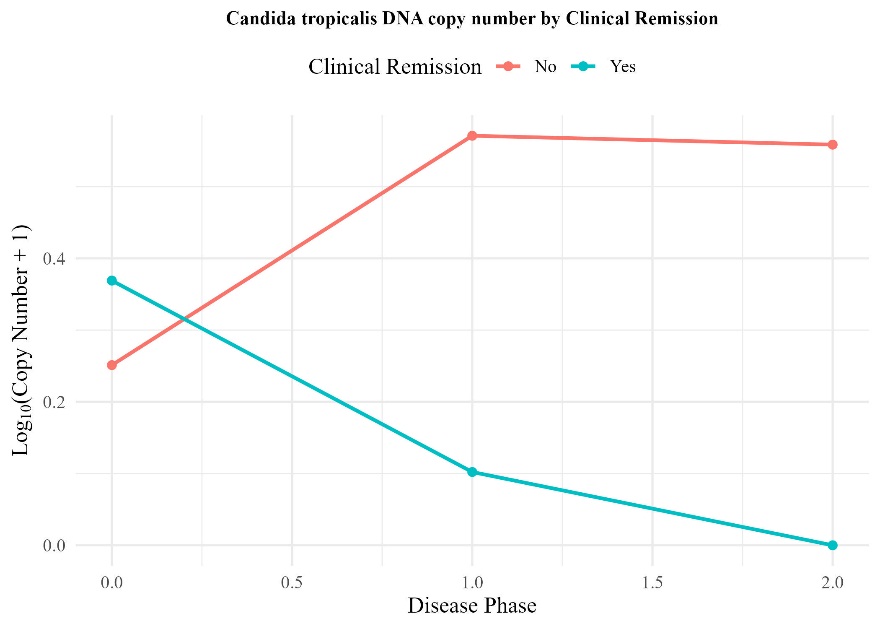

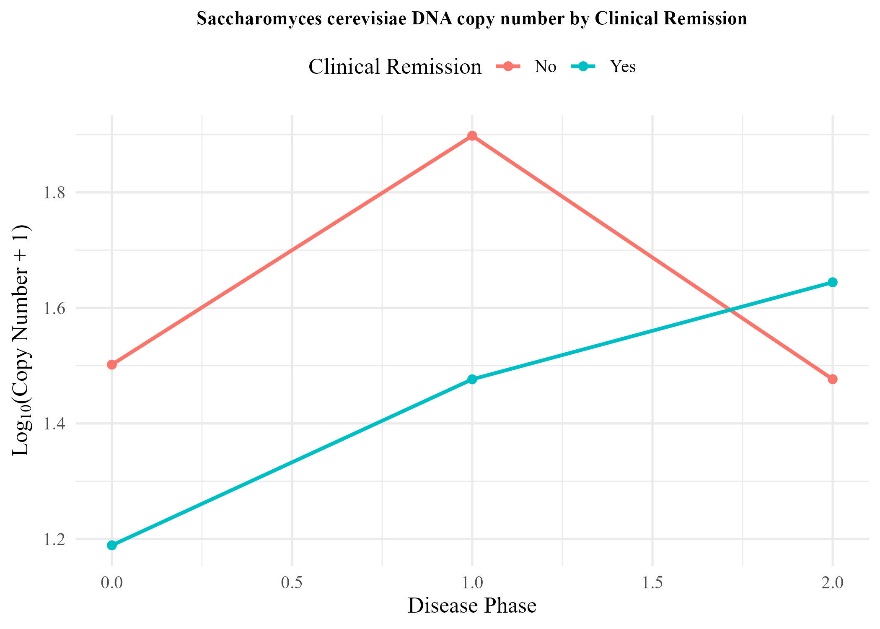


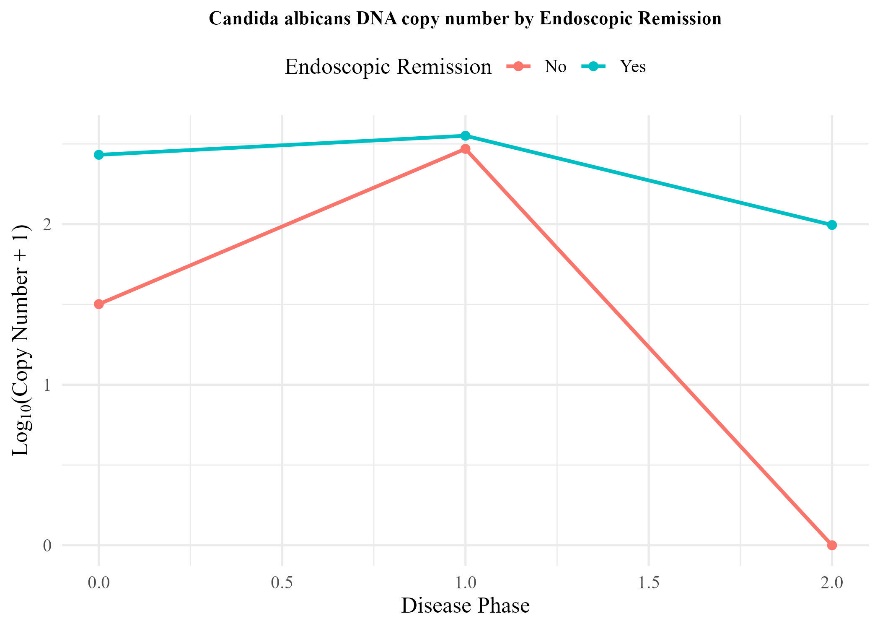

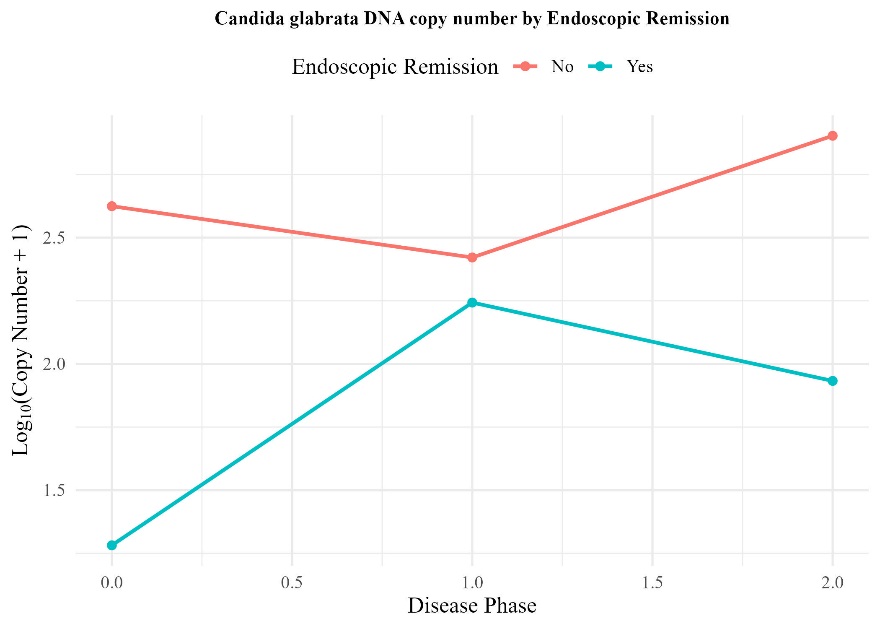


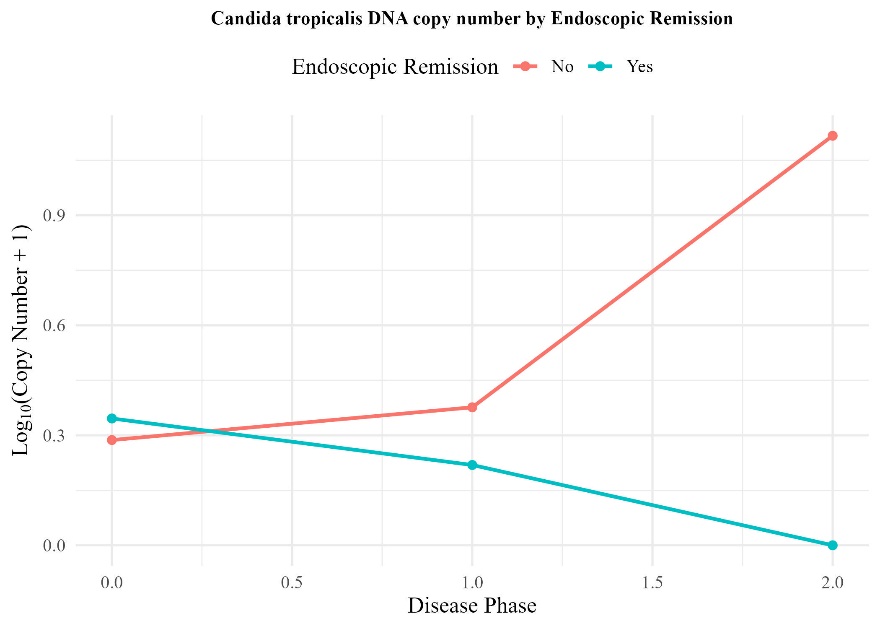

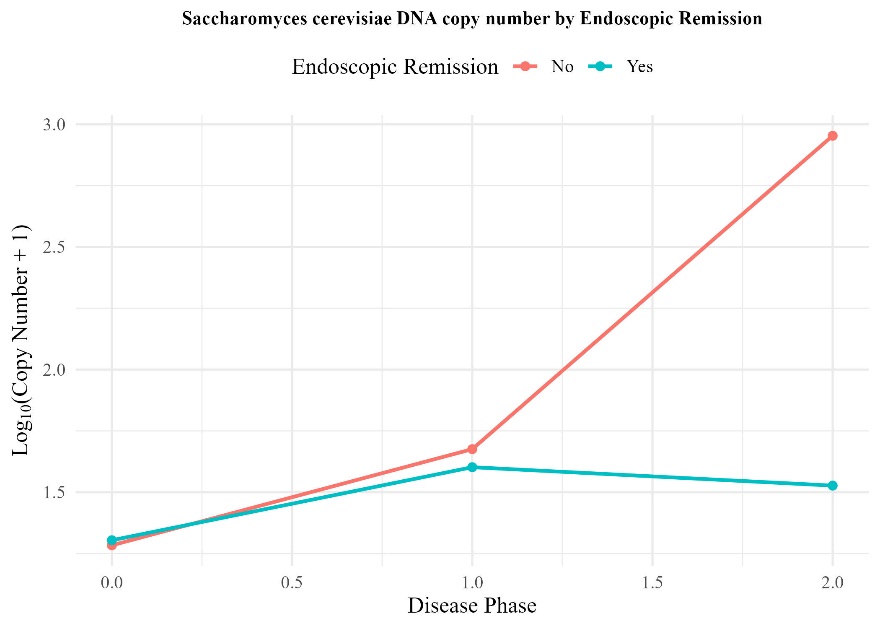


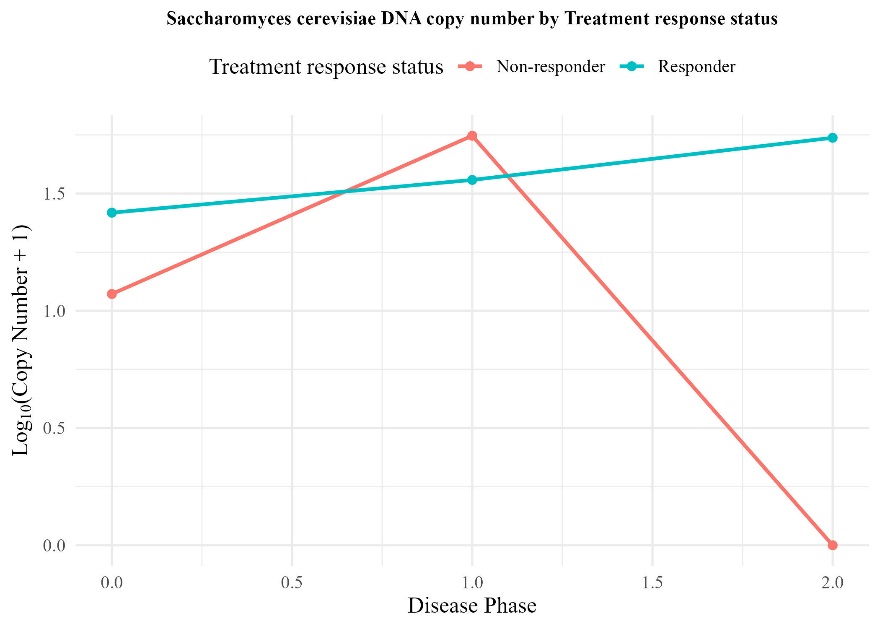

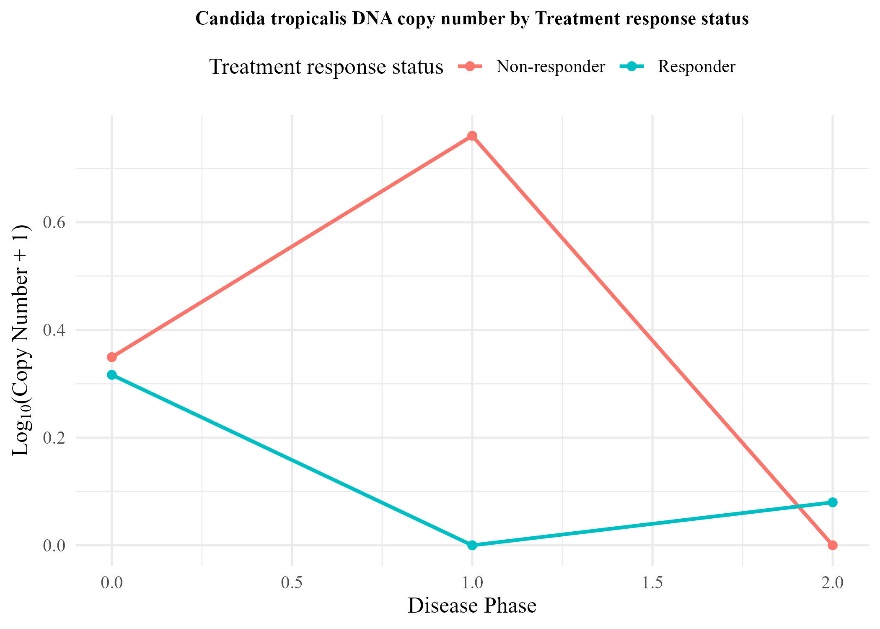

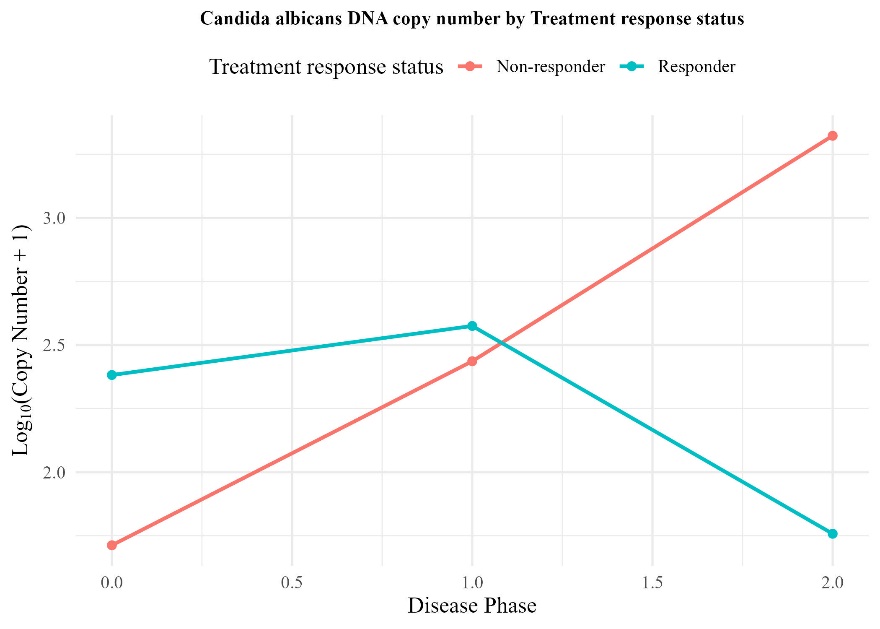

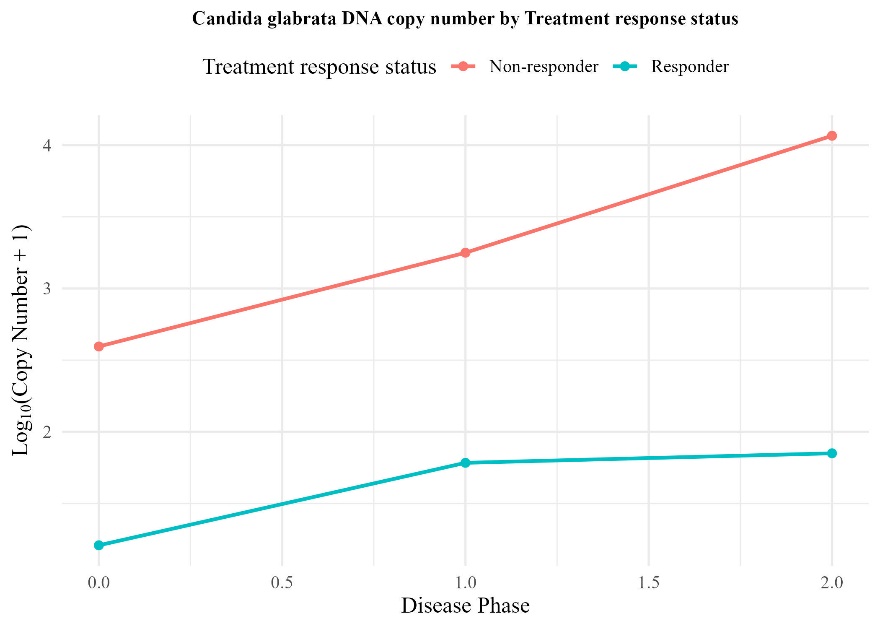


**Figure S1.** Log-transformed fungal DNA copy numbers across disease phases, stratified by clinical and pathological features. Each panel illustrates changes in the abundance of specific fungal species according to phase of disease (remission vs. flare-up), grouped by factors such as treatment response, endoscopic remission, and clinical remission.
